# Supplementary material for: Facile synthesis of multi-type carbon doped and modified nano-TiO2 for enhanced visible-light photocatalysis
Source: PubMed Central journal article supplement — RSC Adv. 2020 Nov 27;10(70):43193–203. doi: 10.1039/d0ra08894c (PMC9058262; doi:10.1039/d0ra08894c), 2020-11-27
Supplement: RA-010-D0RA08894C-s001.pdf [file RA-010-D0RA08894C-s001.pdf]

## Supporting Information

### Facile synthesis of multi-type carbon doped and modified nano-TiO<sub>2</sub> for enhanced visible-light photocatalysis

Jianing Li <sup>1,2</sup>, Junzhong Wang <sup>2</sup>, Juming Liu <sup>1,2,\*</sup>, Yan Li <sup>2</sup>, Huiyan Ma <sup>1,2</sup>, Jucai Yang <sup>1,3</sup> and Qiancheng Zhang <sup>1,2,\*</sup>

<sup>1</sup> Inner Mongolia Key Laboratory of Theoretical and Computational Chemistry Simulation, Inner Mongolia University of Technology, Hohhot 010051, China.

<sup>2</sup> School of Chemical Engineering, Inner Mongolia University of Technology, Hohhot 010051, China.

<sup>3</sup> School of Energy and Power Engineering, Inner Mongolia University of Technology, Hohhot 010051, China.

\* Correspondence: [liujuming@imut.edu.cn](mailto:liujuming@imut.edu.cn) ; [jzhang@imut.edu.cn](mailto:jzhang@imut.edu.cn)

## Content

**Fig. S1** Photographs of the as-prepared samples.

**Fig. S2** The emission spectrum of the blue 450 nm LED.

**Fig. S3** (a1-a2) SEM images and (a3-a5) EDS elemental mapping images of the AT sample. (b1-b2) SEM images and (b3-b5) EDS elemental mapping images of the C<sub>d</sub>AT sample. (c1-c2) SEM images and (c3-c5) EDS elemental mapping images of the C<sub>m</sub>C<sub>d</sub>AT sample.

**Fig. S4** TEM images of the as-prepared (a1, a2) AT, (b1, b2) C<sub>d</sub>AT and (c1, c2) C<sub>m</sub>C<sub>d</sub>AT samples.

**Fig. S5** TG curves of the (a) AT, (b) C<sub>d</sub>AT, and (c) C<sub>m</sub>C<sub>d</sub>AT samples in air atmosphere.

**Fig. S6** Nitrogen adsorption-desorption isotherm (left) and pore size distribution (right) of the (a1, a2) AT, (b1, b2) C<sub>d</sub>AT and (c1, c2) C<sub>m</sub>C<sub>d</sub>AT samples.

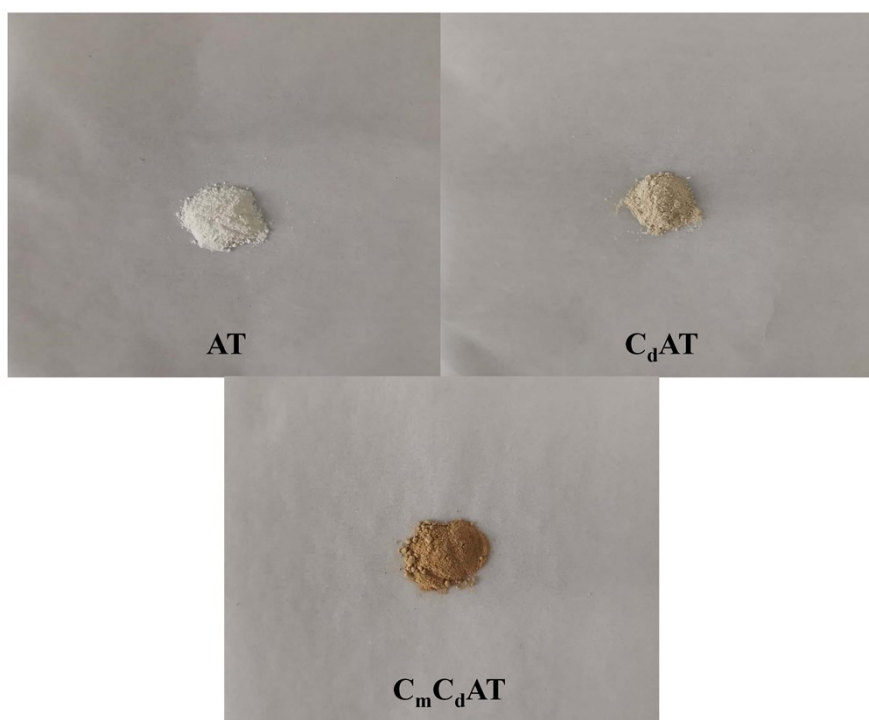

Fig. S1 Photographs of the as-prepared samples.

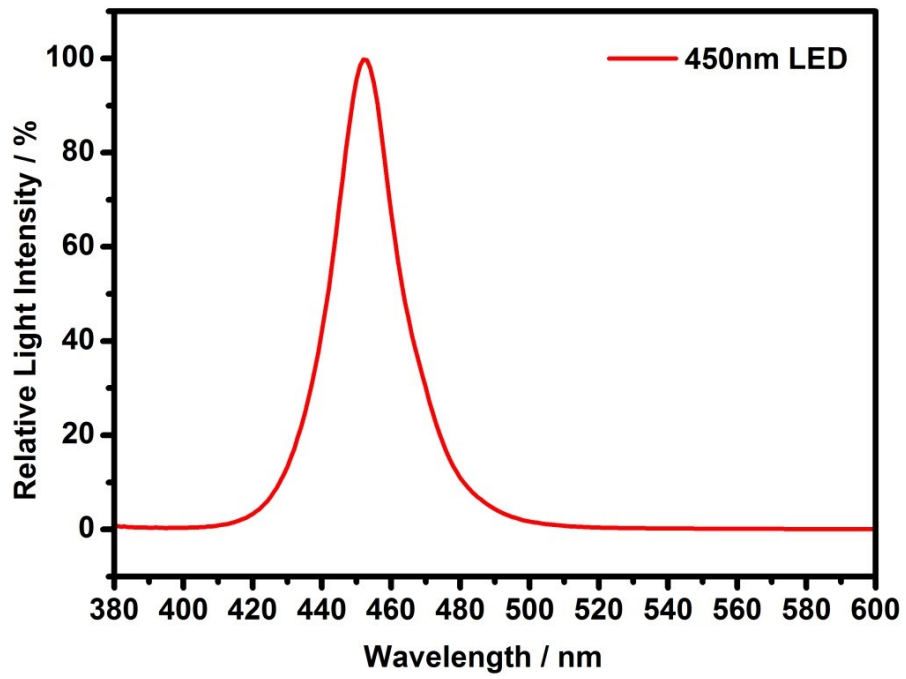

Fig. S2 The emission spectrum of the blue 450 nm LED.

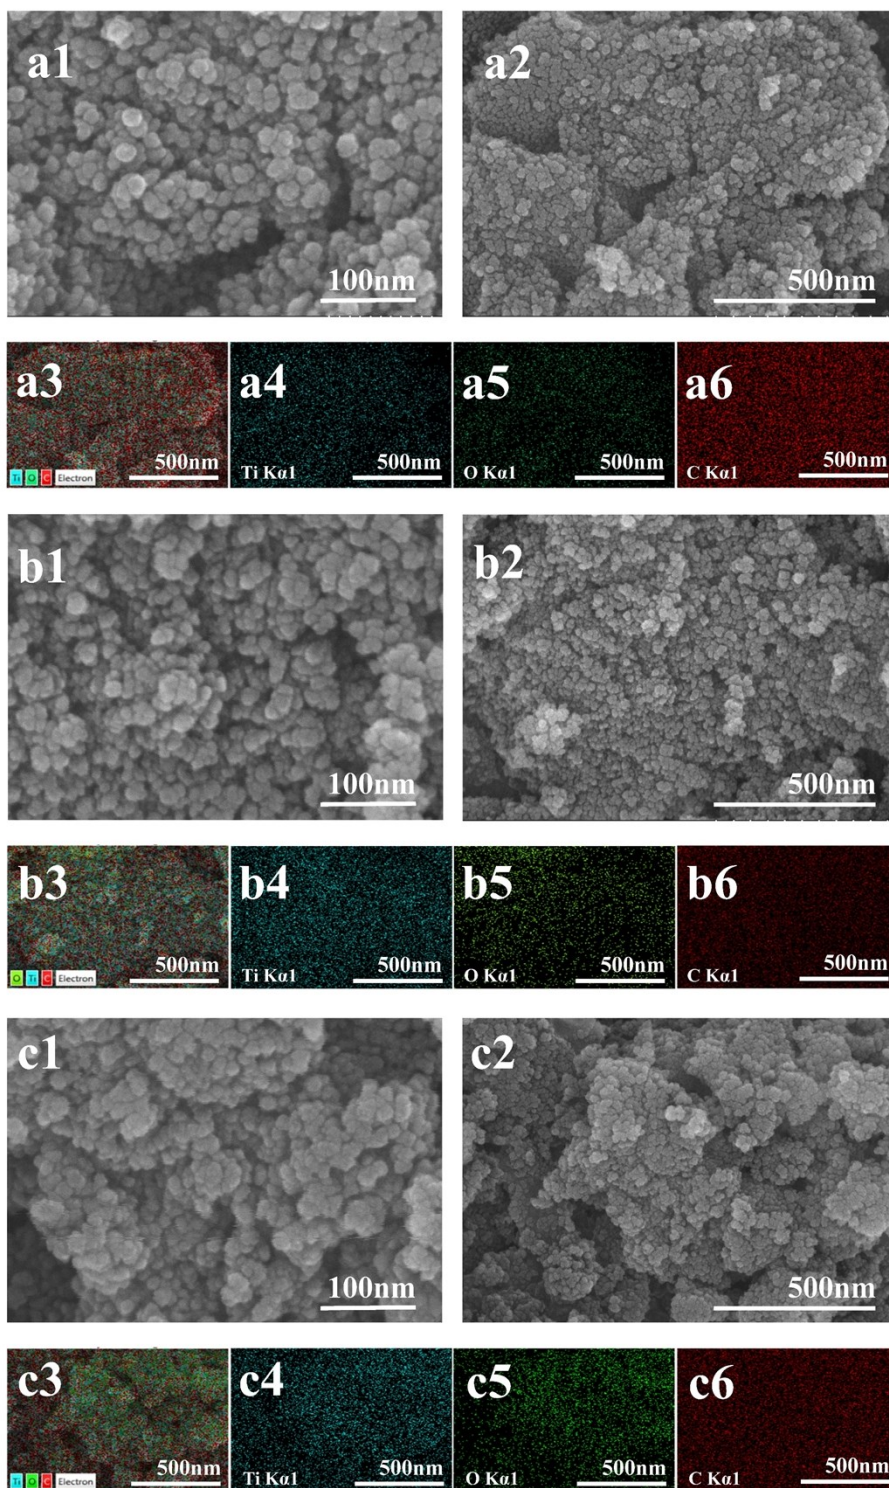

Fig. S3 (a1-a2) SEM images and (a3-a5) EDS elemental mapping images of the AT sample. (b1-b2) SEM images and (b3-b5) EDS elemental mapping images of the CdAT sample. (c1-c2) SEM images and (c3-c5) EDS elemental mapping images of the CmCdAT sample.

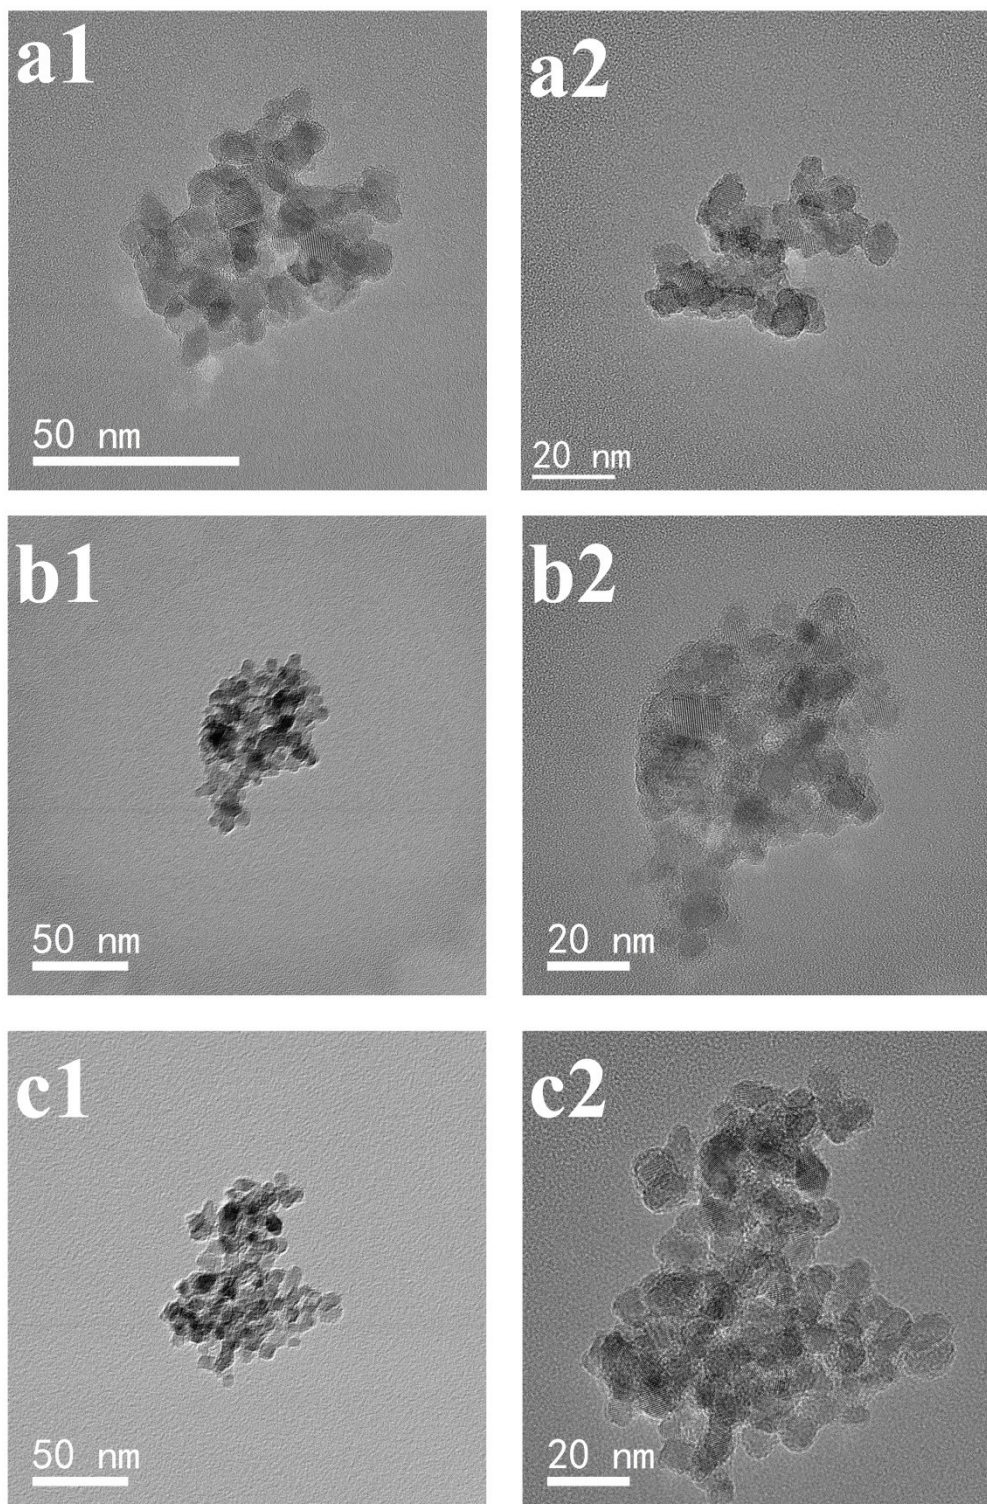

Fig. S4 TEM images of the as-prepared (a1, a2) AT, (b1, b2)  $C_d$ AT and (c1, c2)  $C_mC_d$ AT samples.

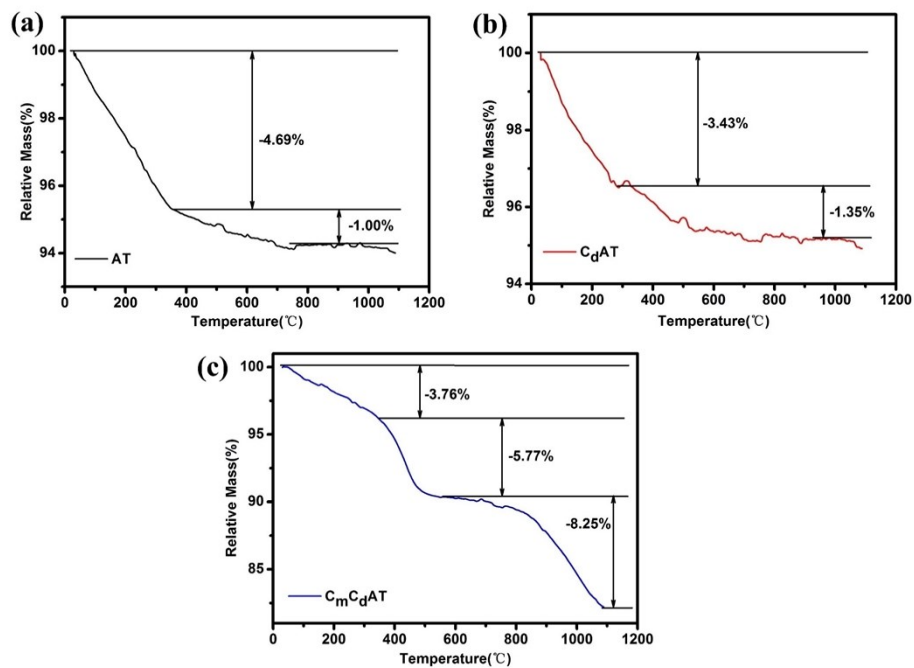

Fig. S5 TG curves of the (a) AT, (b) CdAT, and (c) CmCdAT samples in air atmosphere.

Generally, weight loss below 300 °C should be attributed to the physically adsorbed water and surface hydroxyl groups, and weight loss above 300 °C should be attributed to the loss of carbon species by oxidation and combustion. Therefore, the carbon species loadings of the AT, CdAT, and CmCdAT samples are 1.00%, 1.35% and 14.02%, respectively.

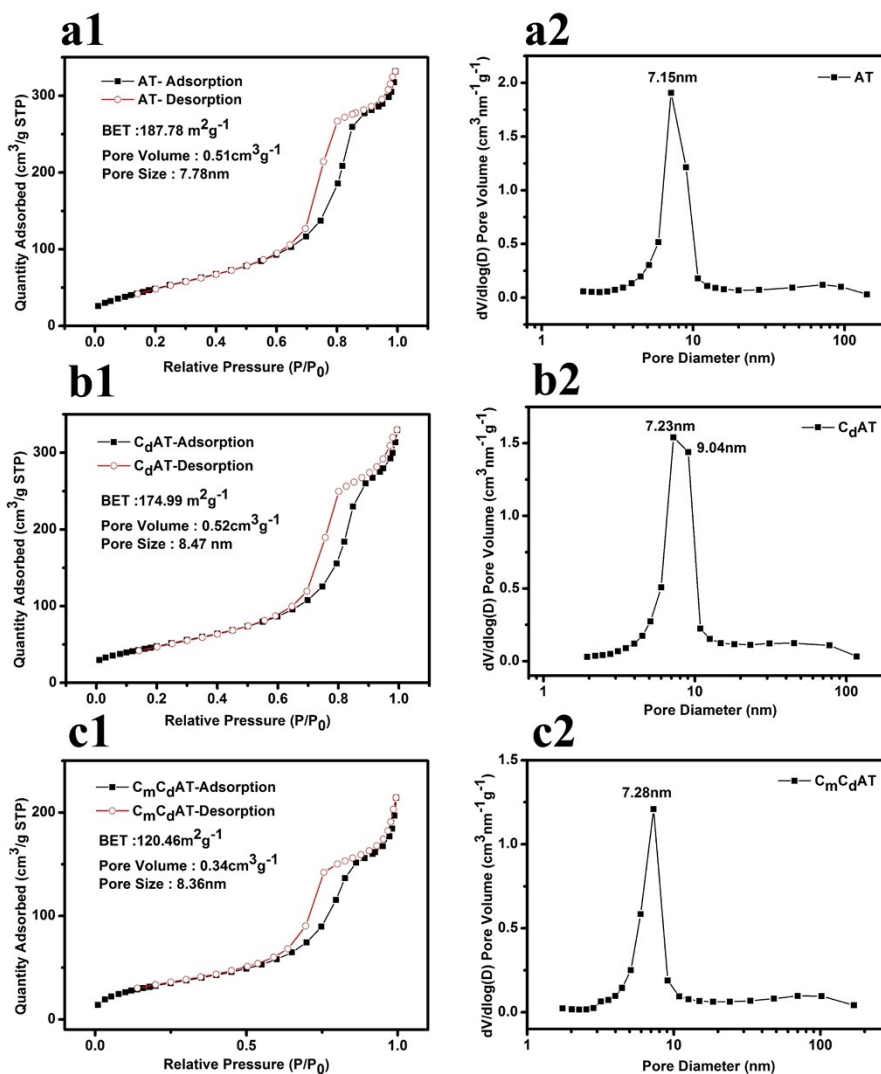

Fig. S6 Nitrogen adsorption-desorption isotherm (left) and pore size distribution (right) of the (a1, a2) AT, (b1, b2) CdAT and (c1, c2) CmCdAT samples.
